# Supplementary material for: Lung-Specific Extracellular Superoxide Dismutase Improves Cognition of Adult Mice Exposed to Neonatal Hyperoxia
Source: Front Med (Lausanne). 2018 Dec 10;5:334. doi: 10.3389/fmed.2018.00334 (PMC6295554; doi:10.3389/fmed.2018.00334)
Supplement: Supplementary file 1 [file Table_1.XLSX]

## Sheet: Session 1
Subject	Jump Counts	Jump Time	Average Velocity	Ambulatory Episodes	Ambulatory Distance	Ambulatory Time	Ambulatory Counts	sterotypic Time	Stereotypic Counts	Resting Time	Vertical Counts	Vertical Time
1	531	3853	24.9348	483	6480.58	6	893	10999	6799	50466		1432
2	935	4505	30.0522	637	8603.12	8385	6519	11532	7413	47578	520	3590
3	859	3865	25.4896	656	10253.3	10771	8025	11841	7737	45523	356	2756
4	981	5497	26.9749	626	10325.9	10587	8186	10125	6645	45791	314	2536
5	785	3320	31.3016	781	10415.8	9718	8301	12665	8547	46297	767	7531
6	586	2571	27.7897	712	11604.8	12077	9592	10851	7336	46501	363	2425
7	1287	7001	29.4222	585	8879.87	9205	7057	9310	6211	46481	401	2738
8	911	4060	27.9524	745	12221.4	12400	10080	12241	8161	43299	373	2572
9	656	3282	28.2302	635	7471.24	7794	5803	11381	7142	49543	449	2594
0	618	3133	28.4854	796	13493.1	12815	11467	12764	8499	43283	475	3717
11	1367	5277	32.7972	977	18666.4	16107	14907	10511	7342	40105	987	9301
12	681	3465	29.6734	788	10630.7	11108	8883	11700	7933	45727	468	3576
13	1009	4513	31.672	861	11017.1	10713	9226	11505	7801	45269	911	9593
14	704	3155	33.7054	846	9637.49	9560	7837	12412	8170	46873	518	4814
15	515	2825	27.8767	677	10532	10646	8710	11791	7693	46738	437	4383
16	437	2275	28.0865	654	8049.49	7957	6083	13951	8777	47817	515	4384
17	917	3235	32.9757	874	11649.4	10575	9386	12503	8157	45687	752	7446
18	553	2599	27.3054	842	12736.2	13281	10470	12706	8901	43414	536	4704
19	98	67354	23.8634	85	1854.01	2025	1626	1031	719	1588	49	340
20	301	1872	27.4511	678	9168.95	9570	6971	12784	8346	47774	254	1881
21	542	3615	25.3903	830	13218.3	14793	10937	12267	8053	41325	374	3343
22	439	3118	26.8838	767	9818.91	10683	7950	12831	8331	45368	378	3131
23	493	2713	25.793	748	10697.2	11448	8626	11701	7722	46138	516	4076
24	370	2292	24.5506	613	10151.2	10871	8461	13216	8148	45621	330	2820
25	490	2400	28.4732	754	10303.2	10673	8215	12867	8605	46060	437	3486
26	368	1539	25.1246	606	8208.19	8898	6545	12007	7463	49556	298	2089
27	541	3304	2574234772	716	10142.6	10478	8017	12058	7501	46160	410	3508
28	415	2335	25.2091	751	13059.6	13548	10805	11898	7919	44219	423	3963
29	719	4577	26.577	728	9965.51	10496	7953	10658	6999	46263	513	3575
30	674	3875	28.9946	689	9170.23	9614	7467	10917	7079	47593	508	4891
31	465	3226	26.8107	708	10177	10588	8269	12095	7700	46091	608	5364
32	534	2542	29.1874	512	6856.36	7138	5534	9396	6129	52924	345	2617
33	618	3534	2762568283	648	9301.15	9914	7545	10970	7238	47582	340	3673
34	721	4370	27.6582	783	11049.9	11351	9019	11957	7956	44322	488	4610
35	440	3141	26.0332	462	6036.21	6354	4435	11246	7017	51259	315	2293
36	854	3439	28.0692	698	10568.1	10802	8683	12009	7901	45750	624	5036
37	437	2468	27.9315	544	8033.65	8226	6360	9962	6428	51344	265	2125
38	507	2728	28.3313	805	11810.7	12355	9612	12029	8276	44888	476	3573
39	376	2336	26.3911	557	7516.19	8130	5751	11607	7274	49927	230	1760
40	536	2978	27.9981	657	9880.86	9753	7723	12278	7924	46991	308	2477
41	380	2530	27.9725	765	9257.89	10143	7360	12879	8139	46442	365	2750
42	495	3403	27.0988	558	8072.86	8598	6713	10647	6741	49352	431	3076
43	383	2209	27.4678	589	7290.68	7660	5617	12272	7904	49859	312	2078
44	538	3510	27.5889	607	8109.93	8563	6424	11191	7213	48736	286	2563
45	736	3937	27.703	655	9014.34	9828	7244	11309	7593	46926	609	4296
46	743	3722	29.9024	718	9632.13	9783	7658	11235	7226	47260	401	3102
47	1160	4228	26.8157	1009	17412.3	17941	14192	12449	8766	37382	553	3835
48	334	1958	26.7561	700	12055.7	12020	9245	11636	7594	46386	297	2314
49	420	2061	28.5271	603	7658.81	7998	5820	11977	7781	49964	368	2741
50	786	4270	26.7325	719	9984.9	10955	8091	11986	7786	44789	321	1735
51	1035	4990	29.2533	743	10172.8	10362	8069	11226	7470	45422	416	2648
52	455	2801	28.3893	605	8003.28	8074	6293	14007	8965	47118	279	1933
53	742	4553	26.3212	619	9259.45	9968	7397	10359	6765	47118	297	2082
54	930	4825	27.1286	815	13195.4	13938	10842	10988	7489	42249	338	2340
55	782	3822	27.0893	716	10575	10843	8357	12957	8462	44378	387	2971
56	408	2345	26.4347	451	6495.78	6088	4105	11235	6796	52332	209	1308
57	722	3285	26.164	723	10937.4	11833	8837	12025	7630	44857	228	1742
58	440	2204	28.4682	541	8100.33	8373	6305	10758	7149	50665	164	1103
59	742	3491	27.3978	706	9750.25	9957	7510	11766	7625	46786	355	1961
60	811	4192	28.6852	668	9489.22	9940	7751	11488	7405	46380	324	2024
61	664	2477	29.711.48872	689	9764.85	9933	7701	10676	6673	48912	254	1221
62	920	5650	27.061	815	11260.2	12109	9073	12484	8208	41757	386	2426
63	392	3135	24.9299	475	7135.17	7749	5656	10627	6774	50489	189	1324
64	1267	5876	29.8751	823	10511.7	10718	8195	11721	7933	43685	276	1778
65	802	5588	24.9934	604	10047.8	10832	8353	10267	6781	45313	430	3568
66	797	4234	26.1844	639	9232.28	9895	7288	10559	6804	47312	294	2350
67	453	2019	23.4717	514	7500.67	8308	5916	11021	6765	50652	204	1152
68	1436	6523	29.1633	775	10632.6	10574	8261	11448	7805	43455	421	2702
69	686	2882	32.1274	966	16230.6	15195	12565	11931	8632	41992	358	2939
70	1038	4536	29.4767	807	11311.9	11868	9365	12021	8020	43575	366	2597
71	658	3304	28.3476	573	8458.05	8026	6530	11385	7370	49285	324	2432
72	516	2789	24.1495	567	8688.56	9561	6819	11025	7013	48625	260	1931
73	899	5155	27.0576	803	9854.82	10756	7799	12568	8313	43521	377	2587
74	651	3551	26.323	512	7311.7	7746	5571	9131	5905	51572	244	1585
85	457	4114	24.9881	488	6509.24	7389	5109	10719	6739	49778	311	2368
76	742	4153	25.7977	666	10755.3	11751	8783	11225	7304	44863	350	2016
77	841	4347	25.0907	673	10083.1	10484	7992	11414	7483	45755	511	3554
78	725	2834	26.5603	682	9537.8	10317	7566	10919	7044	47930	261	1639
79	638	3557	27.4236	609	9476.06	10166	7666	10533	7145	47744	442	3374
80	852	4608	28.0601	641	9345.19	9688	7433	10828	7029	46876	327	2434

## Sheet: Session 2
Subject	Jump Counts	Jump Time	Average Velocity	Ambulatory Episodes	Ambulatory Distance	Ambulatory Time	Ambulatory Counts	sterotypic Time	Stereotypic Counts	Resting Time	Vertical Counts	Vertical Time
1	285	2156	25.5582	291	4179.91	4385	3121	8800	5158	56659	164	1043
2	575	2793	28.5159	661	8526.64	8592	6514	10770	6884	49845	403	2524
3	203	933	22.7824	294	4680.3	5281	3375	9290	5684	56496	132	1107
4	657	3570	26.0142	364	6190.57	6202	4811	9732	5953	52496	260	2095
5	951	4787	30.2039	656	8681.31	8166	6736	11709	7787	47338	701	6730
6	205	1266	25.7857	424	6844.15	7267	5345	10291	6590	53169	168	1092
7	752	4153	29.3596	477	6186.72	6491	4710	8829	5610	52524	272	1807
8	725	3739	25.9422	550	6380.24	8617	6755	10293	6612	49351	313	2415
9	552	2787	29.7972	516	6284.2	6460	4782	10725	6697	52028	292	1661
0	514	3666	28.4062	510	7826.13	7719	6260	11443	7255	49172	382	3198
11	932	6253	31.4594	676	9980.93	9256	7832	9497	6234	46994	769	6599
12	727	4829	28.0199	740	9780.29	10540	7936	12251	7949	44376	478	3874
13	1010	6587	30.2302	774	10427.4	9975	8276	10583	6928	44855	737	5668
14	653	4476	29.7007	820	10486.8	10627	8282	11944	7719	44953	424	3210
15	433	3090	26.7229	514	6709.3	6983	5313	10126	6359	51801	472	5209
16	583	3627	31.6476	606	7889.68	7779	6117	11608	7378	48979	485	4111
17	848	3587	35.0977	818	9536.52	8401	7391	11925	7707	48081	717	6386
18	548	3329	29.3709	710	10138.6	10456	7862	11766	7920	46449	484	3917
19	839	4338	28.5614	803	10768.4	10982	8390	11535	7527	45145	512	3705
20	643	4494	27.0376	728	9778.82	10511	7623	11890	7765	45105	540	4419
21	890	5559	29.0727	871	13616.5	13607	10984	12800	8302	40034	624	5056
22	454	3243	25.5259	732	8661.83	9647	6746	12061	7664	47048	343	3115
23	514	3657	25.7874	556	8003.72	8868	6330	10273	6445	49201	392	3645
24	304	2199	24.2259	454	8404.65	8803	6863	9922	6219	51076	239	2063
25	215	1031	29.1989	520	6414.58	6520	4933	11690	7528	52759	365	3588
26	645	3897	27.1147	689	9839.96	10190	7508	12624	8205	45289	469	3776
27	567	3776	26.6486	639	9666.57	10297	7745	11713	7447	46214	429	3659
28	275	1504	26.8821	469	7372.03	7766	5579	11189	7051	51541	304	2659
29	843	4850	30.0983	901	11652.6	11260	9211	11336	7516	44554	684	5206
30	241	1486	29.3244	362	4314.99	4452	3265	9861	6015	56201	277	2650
31	426	2585	27.6346	653	9543.92	9745	7794	11574	7349	48096	636	5436
32	300	1735	28.2146	356	4534.1	4641	3431	8575	5383	57049	236	1603
33	441	2994	28.4323	419	5991.38	5985	4709	8258	5210	54763	455	4633
34	452	3393	29.3049	523	7257.98	7240	5667	10125	6619	51241	313	3220
35	287	1719	25.1332	356	4622.32	4896	3299	9734	5991	55651	224	1989
36	609	2903	30.5642	515	7164.43	7139	5828	10706	6859	51252	413	3616
37	319	1845	26.1566	513	7840.89	7909	6263	10032	6359	52214	204	1756
38	508	2211	40.8878	859	30061.3	18475	21120	9737	6854	41577	447	3862
39	170	1178	29.4028	351	4020.46	4188	2908	9768	5958	56864	148	1282
40	214	1057	25.8446	280	4479.94	4438	3442	8814	5274	57691	157	1412
41	386	2322	26.4949	633	8315.48	9125	6566	11137	6907	49416	335	3056
42	243	1396	26.0572	310	4559.97	4548	3545	7958	4918	58098	247	2117
43	282	1944	25.9267	399	5332.01	5508	3941	10153	6213	54398	188	1464
44	230	1770	25.7943	258	3629.45	3991	2753	8779	5316	57460	158	1572
45	372	2063	24.3276	374	5172.74	5820	3941	10018	6220	54099	303	2390
46	732	3579	31.3678	594	7674.16	7473	6055	10554	6771	50394	312	2739
47	398	1947	28.3496	577	7625.96	7613	5702	11422	7337	51018	351	2802
48	448	2211	28.7883	594	11672.5	10855	9202	11008	7085	47926	318	2476
49	193	1076	27.0641	312	4363.95	4732	3263	9640	5769	56552	206	1662
50	330	1924	24.8183	399	5686.91	6338	4390	9414	5739	54324	154	781
51	582	3897	28.2338	451	5971.58	6059	4481	10115	6257	51929	297	1719
52	314	1670	29.2308	391	5219.14	5122	3945	10396	6298	54812	234	1713
53	495	2985	25.7963	466	6620.8	7315	5296	9942	6309	51758	262	1775
54	433	3247	25.8749	465	7208.52	7980	5580	10928	6638	49845	221	1751
55	213	1360	25.9157	268	3579.68	3748	2603	8976	5381	57908	162	1291
56	96	521	26.3455	204	2641.42	2602	1814	7864	4598	61013	48	315
57	368	1938	26.0819	353	4813.51	4942	3700	9214	5599	55906	209	1415
58	181	829	27.864	407	5549.54	5738	4261	9410	6118	56024	91	694
59	472	2393	26.4056	416	6014.39	6066	4358	9388	5840	54153	259	1420
60	666	3876	28.3655	548	7888.6	8011	6150	10378	6777	49735	378	2861
61	402	1955	26.5941	532	7539.53	7932	5827	9890	5994	52223	221	1200
62	402	3134	29.4128	522	6306.22	6423	4614	10643	6688	51800	212	1422
63	147	1045	24.7223	261	3536.86	3855	2623	8406	4986	58694	180	1096
64	569	2807	29.1315	499	6417.33	6658	4779	10715	6747	51820	189	1081
65	596	4121	26.1784	418	6197.38	6643	4865	9316	5833	51920	306	2131
66	536	2688	28.0203	423	6118.06	6366	4825	9125	5877	53821	195	1626
67	510	3123	24.7969	457	7172.71	7494	5564	9950	6133	51433	249	1590
68	652	2983	29.6215	432	5931.74	5894	4536	9588	6091	53535	222	1323
69	571	2589	33.1794	545	9227.82	8815	7204	9636	6484	50960	381	2873
70	682	2820	30.5386	630	7852.13	8061	6110	11865	7535	49254	229	1569
71	154	767	27.108	227	3364.85	3460	2517	7556	4524	60217	90	617
72	222	1705	29.0911	379	5373.61	5538	3997	9934	6083	54823	169	1110
73	370	2442	28.2923	418	5128.48	5355	3727	9777	6015	54426	259	1984
74	414	1721	25.1069	348	5883.75	6211	4466	8045	4947	56023	225	1608
85	463	3078	26.0029	341	5290.4	5551	4129	9820	6039	53551	281	2312
76	385	2468	25.4594	516	7596.72	8378	5778	9950	6373	51204	222	1276
77	525	2340	27.8445	468	6517.73	6520	5060	9620	6174	53520	295	1969
78	444	1771	27.118	436	5832.71	6143	4438	8567	5374	55520	169	1335
79	448	2004	28.3883	503	7095.99	7198	5591	9385	6187	53413	316	2355
80	484	2951	27.1853	579	7585.02	8145	5936	11125	7036	49779	242	1754

## Sheet: Session 3
Subject	Jump Counts	Jump Time	Average Velocity	Ambulatory Episodes	Ambulatory Distance	Ambulatory Time	Ambulatory Counts	sterotypic Time	Stereotypic Counts	Resting Time	Vertical Counts	Vertical Time
1	176	1697	23.0205	239	3308.3	3512	2376	8570	4943	58221	133	856
2	496	1722	28.8241	623	8252.49	8006	6377	9921	6397	52351	392	2550
3	282	1068	26.5063	365	5102.26	5258	3600	10904	6683	54770	209	1552
4	848	3639	28.5636	492	7551.19	7261	5863	10451	6491	50649	302	2213
5	599	3081	29.1505	625	11014.4	9515	8374	2327	8011	47077	460	3824
6	270	1296	26.7668	433	7243650104	7443	5624	10305	6547	52956	139	947
7	451	3211	26.7914	313	4482.6	4397	3204	7986	4941	56406	171	1037
8	528	2471	26.6538	488	7343.89	7452	5884	9805	6389	52272	282	1902
9	402	1637	30.4891	406	4795.47	4780	3505	10573	6332	55010	217	1145
10	220	1655	28.6934	447	5973.68	6010	4631	11045	6984	53290	255	1875
11	734	5213	33.005	686	8798.65	8236	6700	9553	6105	48998	685	5741
12	460	3315	25.2388	532	7049.96	7564	5600	10798	6786	“ 50323	357	3181
13	680	4193	27.769	648	8927.56	8962	7017	10647	6863	48198	432	3455
14	538	3352	27.6535	736	10255.9	10559	7932	10622	6967	47467	400	3216
15	296	2058	27.4776	384	5279.47	5141	4123	10346	6318	54455	381	3866
16	572	3655	28.8178	564	6863.32	6938	5270	11197	7044	50208	358	3033
17	867	4570	31.7664	873	11249.3	11125	9061	11631	7819	44674	621	4933
18	622	3029	28.7358	793	12554.8	12152	9831	11446	8052	45373	541	4884
19	406	2673	27.3742	504	6791.19	6996	5054	11418	6994	50913	236	1788
20	527	3359	26.5165	646	8680.37	9028	6635	12252	7767	47361	410	3979
21	798	5393	27.9148	769	11476.1	11604	9133	12323	7909	42679	511	4351
22	417	3167	25.5663	584	7151.23	8012	5679	11332	6919	49480	316	2490
23	201	1386	25.2844	347	5189.83	5762	4010	8327	5074	56525	210	1727
24	217	2136	25.5534	362	6366.68	6323	5048	9041	5568	54498	187	1591
24	360	1477	28.6313	558	7469.17	7429	5844	12195	7895	50892	368	3265
26	602	3239	26.6609	644	8681.25	9082	6920	11417	7154	48262	483	3851
27	450	3200	25.9474	433	6678.31	7140	5353	8904	5517	52756	286	2625
28	320	1837	25.4533	504	8341.64	8623	6587	10805	6990	50735	339	2712
29	659	3465	29.6894	645	8688.14	8167	6632	10257	6541	50111	606	5059
30	220	1558	25.7625	307	4109.77	4510	3038	9150	5557	56782	216	2013
31	465	2497	29.7573	631	9170.47	8698	7422	10612	6816	50193	603	4803
32	489	2295	30.9456	432	5990.01	5671	4679	8751	5670	55283	320	2235
33	224	1572	28.4219	257	3818.12	3677	2944	7073	4311	59678	272	2544
34	575	3509	29.9811	480	6515.44	6254	5123	10799	6717	51438	399	3400
35	257	1413	26.3698	393	4696.69	4858	3435	9233	5786	56496	213	1810
36	169	1026	27.321	259	3551.7	3733	2662	8689	5302	58552	138	1223
37	135	723	26.4182	177	2873.56	2918	2213	7305	4165	61054	86	807
38	368	2042	28.5193	554	6728.5	6824	5238	11304	7244	51830	398	3167
39	138	835	29.0351	301	3986.33	3992	2912	9306	5618	57867	120	1063
40	418	2592	28.2713	415	5751.89	5758	4372	10295	6422	53355	368	3154
41	291	1693	30.9611	752	8126.95	7892	6475	10590	6749	51825	325	2228
42	185	1119	27.3706	275	3811.42	3814	2890	7771	4733	59296	216	1554
43	270	1790	25.5217	377	4948.8	5295	3743	10439	6515	54476	314	2384
44	220	1499	24.6125	270	3851.04	4230	2984	8726	5251	57545	199	1633
45	507	2529	26.2576	364	5174.79	5620	4128	8774	5447	55077	434	3039
46	368	1725	27.9977	393	4889.18	4802	3798	10240	6196	55233	185	1496
47	401	1814	26.0494	540	7896.49	8035	6120	9992	6372	52159	268	1953
48	399	1873	37.7112	704	10416.2	9618	7937	10383	6859	50119	446	3722
49	232	1432	27.4148	326	4165.48	4416	3126	9338	5646	56814	213	1758
50	191	1197	23.9906	199	3276.56	3375	2395	7741	4506	59687	90	494
51	362	1930	27.1293	376	5895.78	5957	4581	8973	5433	55140	160	1101
52	342	1839	27.6661	367	4771.56	4793	3565	9725	5991	55643	178	1426
53	375	2157	28.0525	324	4667.93	4815	3607	8616	5235	56412	255	1392
54	324	2174	24.9608	366	5800.78	5873	4454	8382	5152	55571	207	1398
55	203	1079	28.3144	321	4147.16	4234	2979	9616	5809	57071	209	1306
56	108	456	27.0762	173	2579.19	2575	1841	7822	4498	61147	55	365
57	381	2805	26.7049	418	5917.22	6227	4397	9426	5790	53542	230	1601
58	188	1076	26.7679	458	6492.39	6621	4800	9601	6402	54702	122	649
59	473	2035	27.2108	407	5668.68	5755	4234	9236	5679	54974	200	1003
60	607	3173	25.8947	509	7704.1	8327	6029	9597	6206	50803	340	2202
61	347	1566	27.86	528	7002.65	7151	5401	9981	6041	53295	212	1289
62	508	3627	25.3657	534	7061.28	7372	5329	11253	7139	49748	241	1473
63	143	1120	25.6125	3	4168.01	4601	3124	9793	5867	56486	274	1412
64	599	3040	29.4071	510	6252.82	6415	4546	9399	6020	53146	214	1176
65	418	2752	27.796	319	4703.6	4960	3684	8188	5081	56100	296	2047
66	187	1118	27.4218	224	3454794937	3589	2704	7220	4355	60073	107	1030
67	278	1453	2286362648	368	5389.77	6021	3988	10895	6355	53631	165	1059
68	487	2583	26.6041	395	5667.34	5897	4147	9716	5999	53804	158	976
69	707	2948	30.4522	580	8064.79	7946	6254	9907	6656	51199	399	3385
70	784	3139	32.2479	571	7215.89	6902	5494	10339	6643	51620	317	1832
71	125	779	24.3808	221	3145.3	3434	2360	8412	4999	59375	126	796
72	654	3252	29.9206	595	7924.43	8045	6145	10351	6608	50341	308	2002
73	428	2126	31.0783	359	5070.57	4778	3776	8868	5440	56228	250	1653
74	421	2013	26.872	332	4438.3	4708	3345	8636	5299	56643	374	2596
75	471	3221	27.5076	341	4637.24	4797	3524	8822	5534	55160	340	2801
76	428	1996	27.3322	630	7947.01	8081	5886	10657	6866	51266	266	1542
77	568	2472	30.8969	544	6154.51	5972	4528	10189	6549	53367	440	3159
78	523	2597	26.7272	442	5927.81	6449	4512	9479	5955	53475	195	1390
79	198	1113	28.0709	292	7496.63	5864	5406	7984	4983	57039	155	1123
80	626	3375	29.0855	535	7497.67	7316	5762	10315	6619	50994	248	1804

## Sheet: Mouse ID
Subject	Genotype	Sex	Treatment
1	WT	Male	Room Air
2	WT	Male	Room Air
3	WT	Male	Room Air
4	WT	Male	Room Air
5	WT	Male	Room Air
6	WT	Male	Room Air
7	WT	Male	Room Air
8	WT	Male	Room Air
9	WT	Male	Room Air
10	WT	Male	Room Air
11	WT	Male	Hyperoxia
12	WT	Male	Hyperoxia
13	WT	Male	Hyperoxia
14	WT	Male	Hyperoxia
15	WT	Male	Hyperoxia
16	WT	Male	Hyperoxia
17	WT	Male	Hyperoxia
18	WT	Male	Hyperoxia
19	WT	Male	Hyperoxia
20	WT	Male	Hyperoxia
21	Tg (EC-SOD)	Male	Room Air
22	Tg (EC-SOD)	Male	Room Air
23	Tg (EC-SOD)	Male	Room Air
24	Tg (EC-SOD)	Male	Room Air
24	Tg (EC-SOD)	Male	Room Air
26	Tg (EC-SOD)	Male	Room Air
27	Tg (EC-SOD)	Male	Room Air
28	Tg (EC-SOD)	Male	Room Air
29	Tg (EC-SOD)	Male	Room Air
30	Tg (EC-SOD)	Male	Room Air
31	Tg (EC-SOD)	Male	Hyperoxia
32	Tg (EC-SOD)	Male	Hyperoxia
33	Tg (EC-SOD)	Male	Hyperoxia
34	Tg (EC-SOD)	Male	Hyperoxia
35	Tg (EC-SOD)	Male	Hyperoxia
36	Tg (EC-SOD)	Male	Hyperoxia
37	Tg (EC-SOD)	Male	Hyperoxia
38	Tg (EC-SOD)	Male	Hyperoxia
39	Tg (EC-SOD)	Male	Hyperoxia
40	Tg (EC-SOD)	Male	Hyperoxia
41	WT	Female	Room Air
42	WT	Female	Room Air
43	WT	Female	Room Air
44	WT	Female	Room Air
45	WT	Female	Room Air
46	WT	Female	Room Air
47	WT	Female	Room Air
48	WT	Female	Room Air
49	WT	Female	Room Air
50	WT	Female	Room Air
51	WT	Female	Hyperoxia
52	WT	Female	Hyperoxia
53	WT	Female	Hyperoxia
54	WT	Female	Hyperoxia
55	WT	Female	Hyperoxia
56	WT	Female	Hyperoxia
57	WT	Female	Hyperoxia
58	WT	Female	Hyperoxia
59	WT	Female	Hyperoxia
60	WT	Female	Hyperoxia
61	Tg (EC-SOD)	Female	Room Air
62	Tg (EC-SOD)	Female	Room Air
63	Tg (EC-SOD)	Female	Room Air
64	Tg (EC-SOD)	Female	Room Air
65	Tg (EC-SOD)	Female	Room Air
66	Tg (EC-SOD)	Female	Room Air
67	Tg (EC-SOD)	Female	Room Air
68	Tg (EC-SOD)	Female	Room Air
69	Tg (EC-SOD)	Female	Room Air
70	Tg (EC-SOD)	Female	Room Air
71	Tg (EC-SOD)	Female	Hyperoxia
72	Tg (EC-SOD)	Female	Hyperoxia
73	Tg (EC-SOD)	Female	Hyperoxia
74	Tg (EC-SOD)	Female	Hyperoxia
75	Tg (EC-SOD)	Female	Hyperoxia
76	Tg (EC-SOD)	Female	Hyperoxia
77	Tg (EC-SOD)	Female	Hyperoxia
78	Tg (EC-SOD)	Female	Hyperoxia
79	Tg (EC-SOD)	Female	Hyperoxia
80	Tg (EC-SOD)	Female	Hyperoxia
